# Supplementary material for: Aeolus wind lidar observations of the 2019/2020 Quasi-Biennial Oscillation disruption with comparison to radiosondes and reanalysis
Source: Copernicus journal article supplement (doi:10.5194/egusphere-2023-285), 2023-03-07
Supplement: Supplementary file 1 [file egusphere-2023-285-supplement.zip]

Archive with 3 entries (3 files):
- Animated_Figure_S2.gif
- Banyard_et_al_QBO_Aeolus_ACP_Supplementary.pdf
- Figure_S1.png
