# Supplementary material for: Aeolus wind lidar observations of the 2019/2020 Quasi-Biennial Oscillation disruption with comparison to radiosondes and reanalysis
Source: Copernicus journal article supplement (doi:10.5194/egusphere-2023-285), 2023-03-07
Supplement: Supplementary file 1 [file egusphere-2023-285-supplement.zip › Banyard_et_al_QBO_Aeolus_ACP_Supplementary.pdf]

# Supplementary material for Aeolus wind lidar observations of the 2019/2020 Quasi-Biennial Oscillation disruption with comparison to radiosondes and reanalysis

Timothy P. Banyard<sup>1</sup>, Corwin J. Wright<sup>1</sup>, Scott M. Osprey<sup>2, 3</sup>, Neil P. Hindley<sup>1</sup>, Gemma Halloran<sup>4</sup>, Lawrence Coy<sup>5, 6</sup>, Paul A. Newman<sup>5</sup>, and Neal Butchart<sup>7</sup>

<sup>1</sup>Centre for Space, Atmospheric and Oceanic Science, University of Bath, Bath, UK

<sup>2</sup>National Centre for Atmospheric Science, Oxford, UK

<sup>3</sup>Department of Physics, University of Oxford, Oxford, UK

<sup>4</sup>Met Office, Exeter, UK

<sup>5</sup>NASA Goddard Space Flight Center Greenbelt, Maryland, USA

<sup>6</sup>SSAI, Lanham, Maryland, USA

<sup>7</sup>Met Office Hadley Centre, Reading, UK

**Correspondence:** Timothy P. Banyard (tpb38@bath.ac.uk)

## 1 Figure S1

Unfiltered Hövmoller plots of zonal wind perturbations from the zonal-mean at 16 km for the December 2019 - April 2020 disruption time period, for (a) Aeolus and (b) ERA5 as Aeolus. The 3 dashed magenta lines during the period of the disruption correspond to the cross-sectional snapshots in figure 7. The vertical dashed green lines mark the longitude of the Singapore  
5 radiosonde launch site, 104°. Data is interpolated onto a 2° resolution longitude grid to match the format of figure 6.

## 2 Animated figure S2

Animation of vertical along-equator cross-sections of the daily averaged zonal wind perturbation from the zonal-mean between 5°N and 5°S for the period 2019-12-01 - 2020-04-01. Data is interpolated onto a 2° resolution longitude grid to match the format of figure 7.
