# Supplementary figures and images for: Aeolus wind lidar observations of the 2019/2020 Quasi-Biennial Oscillation disruption with comparison to radiosondes and reanalysis
Source: Copernicus journal article supplement (doi:10.5194/egusphere-2023-285), 2023-03-07

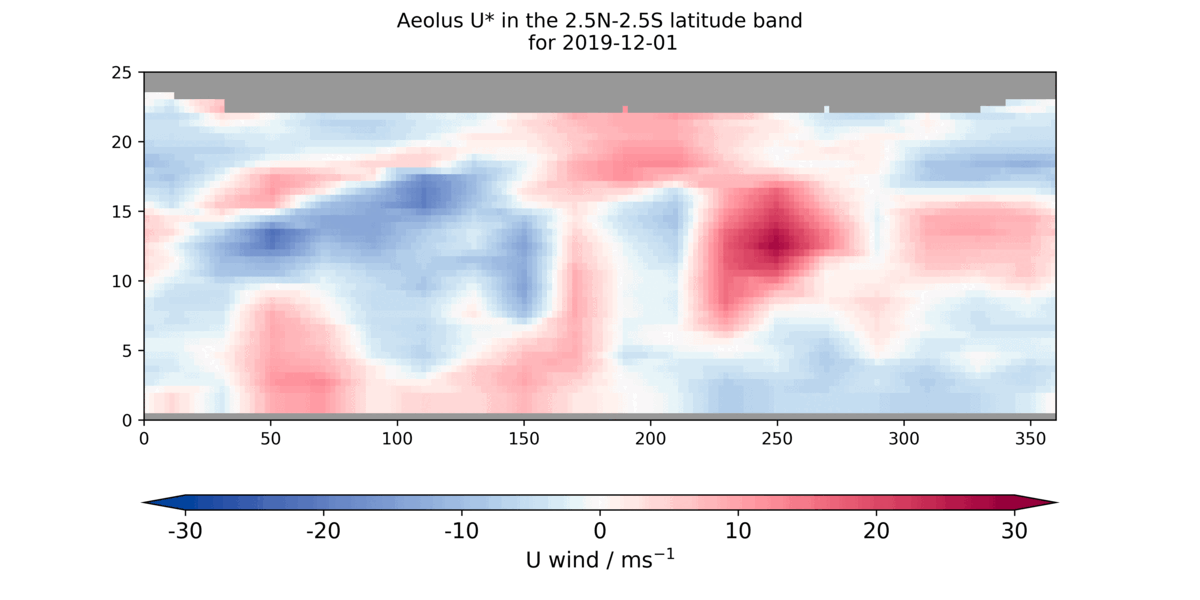

Supplement: Supplementary file 1 [file egusphere-2023-285-supplement.zip › Animated_Figure_S2.gif]

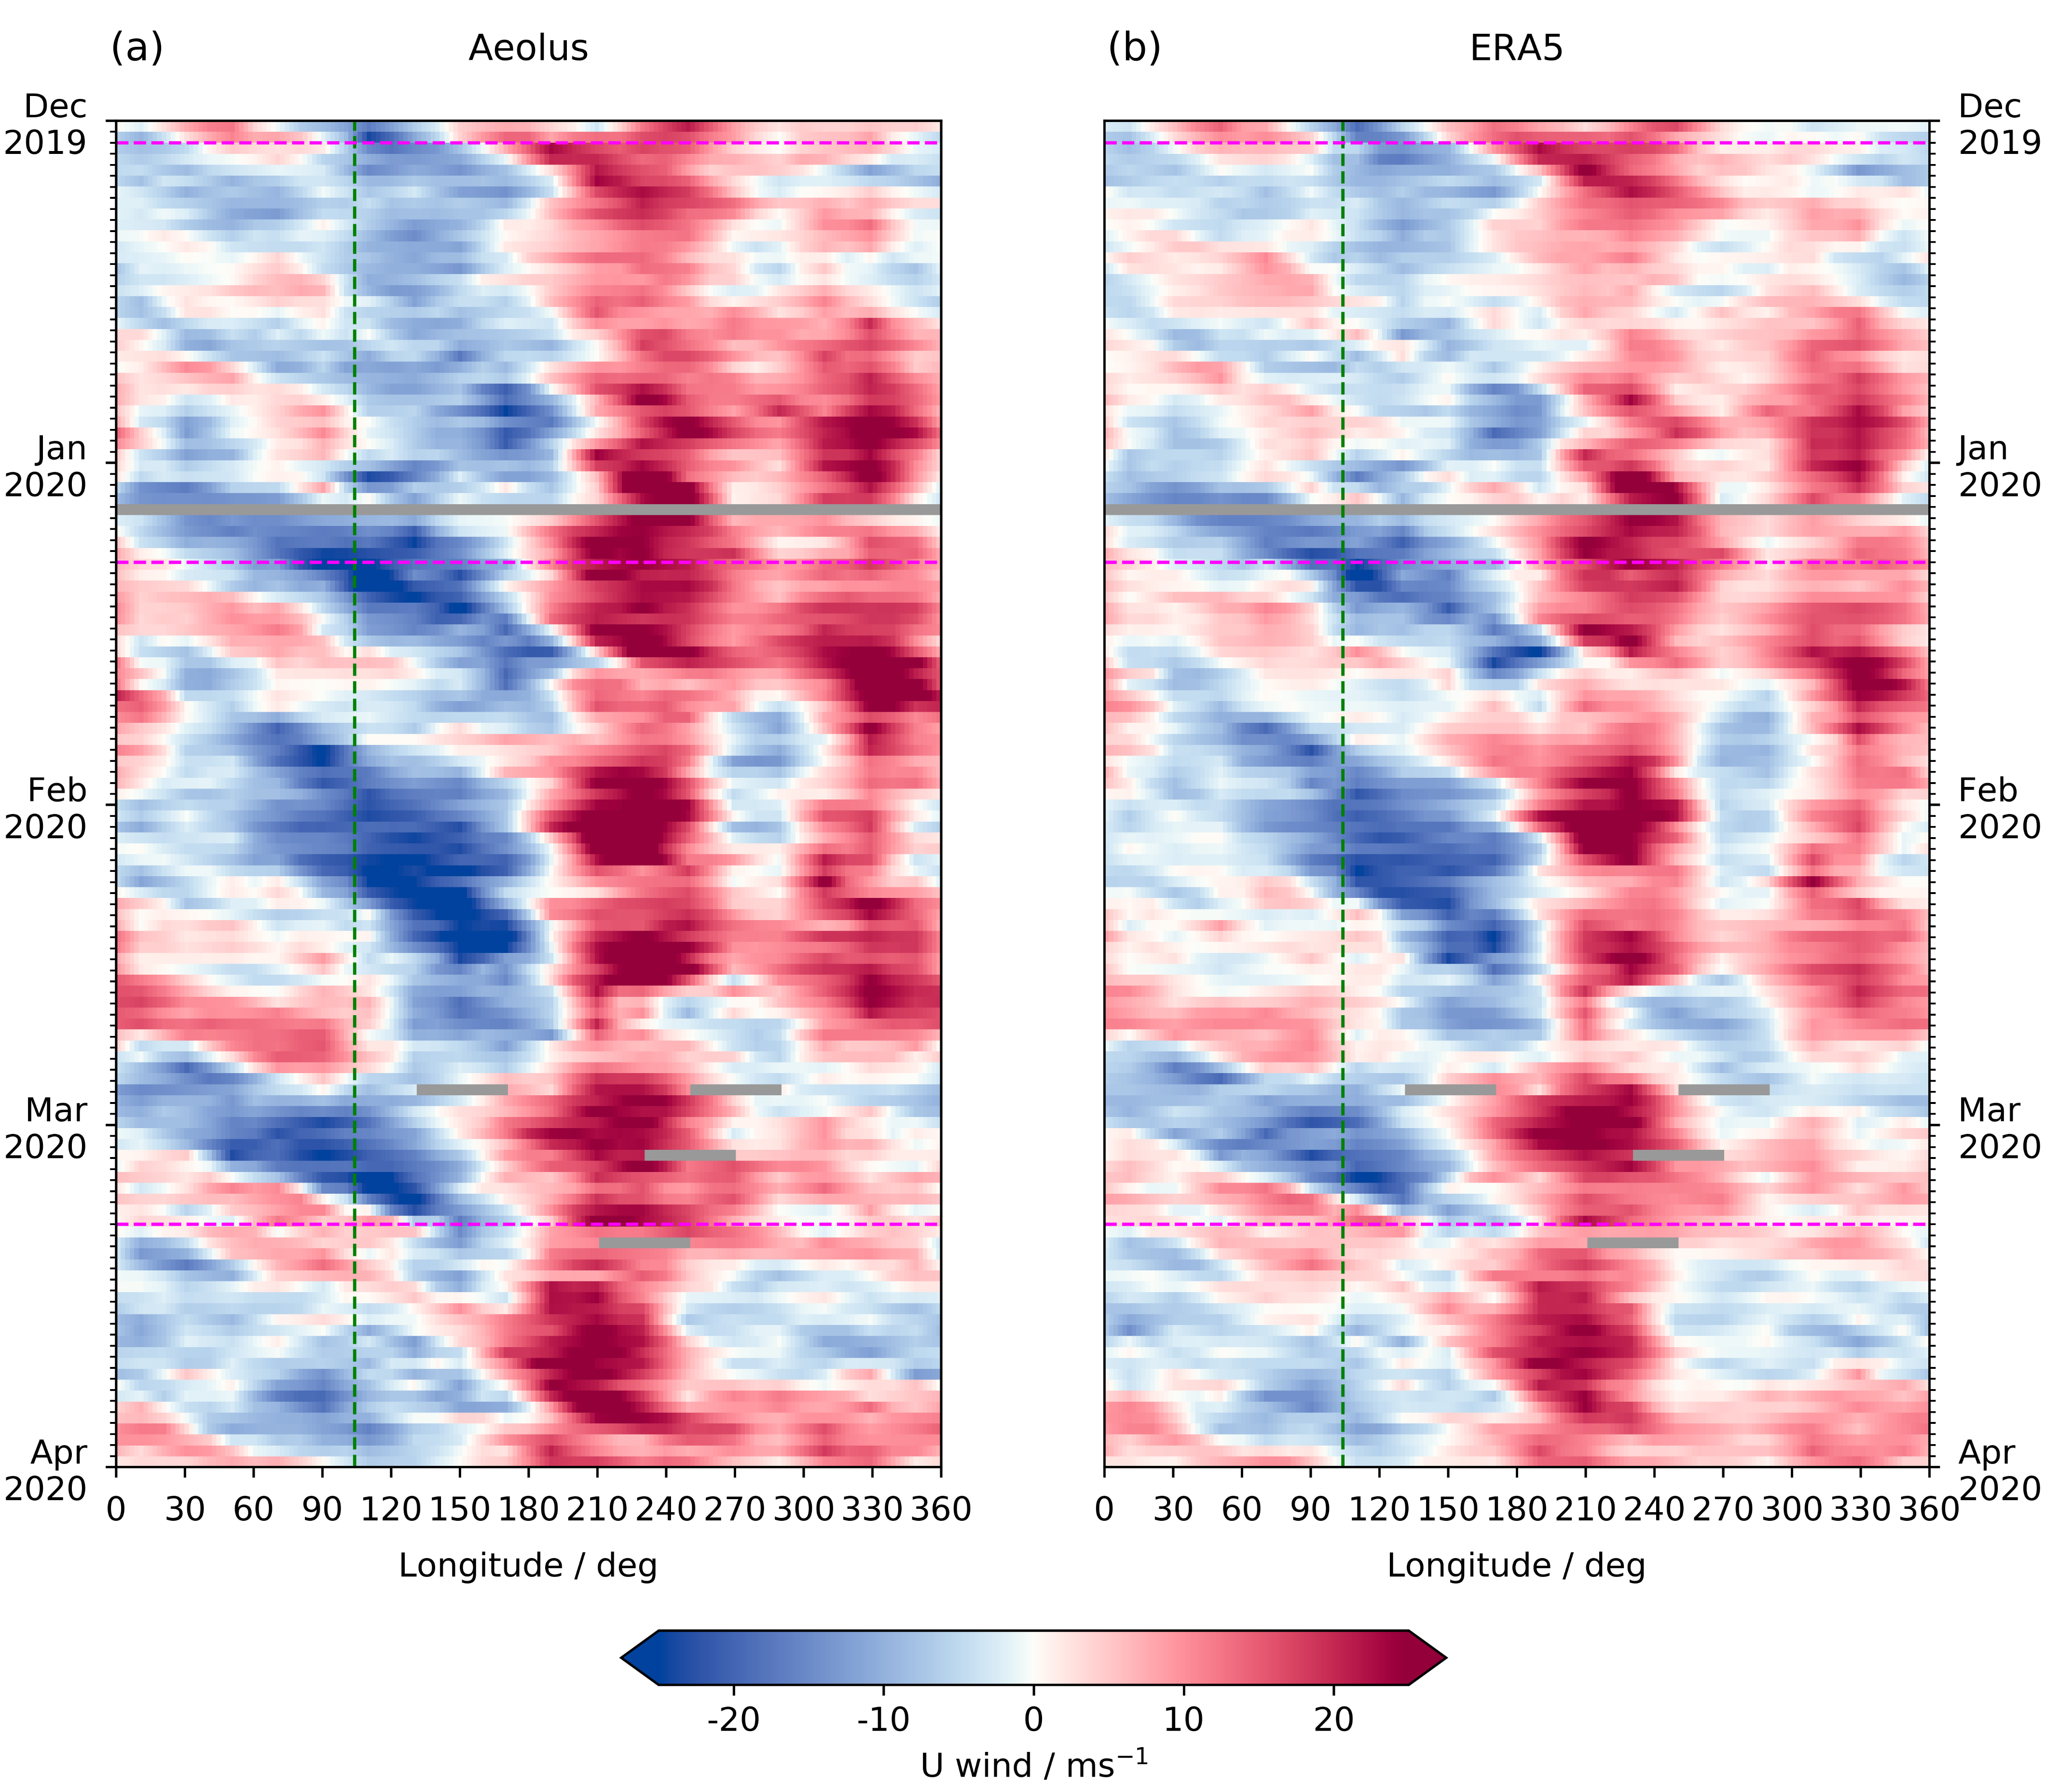

Supplement: Supplementary file 1 [file egusphere-2023-285-supplement.zip › Figure_S1.png]
